# Supplementary material
Source: ML conference proceedings conference paper supplement (https://openaccess.thecvf.com/content/ICCV_2019/html/Choi_Deep_Meta_Learning_ICCV_2019_paper.html)
Supplement: Supplementary file 2 [file Choi_Deep_Meta_Learning_ICCV_2019_supplemental.zip]

Archive with 2 entries (2 files):
- MLT_ICCV2019_ID4309_DEMO.mp4
- MLT_ICCV2019_ID4309_SUPP_CAM.pdf
